# Supplementary material for: Psychological and Social Impact of Announcing Cancer Diagnosis in a Moroccan Oncology Unit: A Cross-Sectional Study
Source: Research Square preprint supplement (doi:10.21203/rs.3.rs-6606310/v1), 2025-06-17
Supplement: Supplementary file 1 [file 106d8e71969f43e272b2d876.docx]

**APPENDIX I :** Patient Questionnaire on announcing cancer diagnosis

**A. Sociodemographic Characteristics**

| Question | Response Options |
| --- | --- |
| Sex | Male / Female |
| Age | __________ |
| Level of Education | Never attended school; Primary; Secondary; Higher |
| Employment Status | Student; Salaried; Unemployed; Self-employed; Retired |
| Marital Status | Single; Divorced; Married; Widowed |
| Place of Residence | Urban; Rural |
| Living Situation | Lives alone; With spouse; With family/others |
| Monthly Income (MAD) | <3000; 3000–5000; 5000–10000; >10000 |

**B. Medical Characteristics**

| Question | Response Options |
| --- | --- |
| Type of Cancer | _________________________ |
| Stage of Disease | ________________________ |
| Proposed Treatments | Surgery; Radiotherapy; Chemotherapy; Targeted; Hormonal; Immunotherapy; Palliative care |

**C. Diagnosis Disclosure and Patient Experience**

| Question | Response Options |
| --- | --- |
| How was the diagnosis communicated? | Face-to-face; Phone; Mail; Non-verbal |
| Duration of diagnosis consultation | ___ minutes |
| Number of consultations for full diagnosis | 1; 2; 3+ |
| Doctor used appropriate language? | Yes completely; Yes somewhat; No not really; Not at all; Not sure |
| Doctor offered to meet a nurse/specialist? | Yes nurse; Yes specialist; No; Not sure |
| If not offered, did you meet them independently? | Yes; No; Not sure |
| Adequate listening by professionals? | Yes completely; Yes somewhat; No not really; Not at all; Not sure |
| Did professionals answer your questions? | All; Some; Few; None |
| Doctor asked your opinion on treatment? | Yes; No; Not sure |
| Enough time to discuss treatment? | Yes completely; Yes somewhat; No not really; Not at all; Not sure |
| Doctor explained treatment effects? | Yes; No; Not sure |
| Received enough info on side effects? | Yes completely; Yes somewhat; No not really; Not at all; Not sure |
| Doctor respectful and attentive? | Yes completely; Yes somewhat; No not really; Not at all; Not sure |
| Felt supported by doctor? | Yes completely; Yes somewhat; No not really; Not at all; Not sure |
| Able to contact doctor outside consultation? | Very easily; Fairly easily; Difficult; Very difficult; Didn’t try; Not sure |
| Nurse respectful during care session? | Yes completely; Yes somewhat; No not really; Not at all; Didn’t meet nurse; Not sure |
| Felt supported by nurse? | Yes completely; Yes somewhat; No not really; Not at all; Not sure |
| Able to contact nurse or staff? | Very easily; Fairly easily; Difficult; Very difficult; Didn’t try; Not sure |
| Felt medically supported to cope? | Yes completely; Yes somewhat; No not really; Not at all; Not sure |
| Care meets expectations and needs? | Yes completely; Yes somewhat; No not really; Not at all; Not sure |
| Asked about social/family/financial situation? | Yes; No; Not sure |
| Situation sufficiently considered? | Yes completely; Yes somewhat; No not really; Not at all; Not sure |
| GP informed of diagnosis/treatment? | Yes; No; Not sure |
| GP received enough information? | Yes; No; Not sure |
| Can GP contact hospital team easily? | Yes; No; Not sure |

**D. Hospital Anxiety and Depression Scale (HADS)**

| Item | Statement |
| --- | --- |
| HADS-1 | I feel tense or ‘wound up’ |
| HADS-2 | I get a sort of frightened feeling as if something awful is about to happen |
| HADS-3 | Worrying thoughts go through my mind |
| HADS-4 | I can sit at ease and feel relaxed |
| HADS-5 | I get a sort of frightened feeling like ‘butterflies’ in the stomach |
| HADS-6 | I feel restless as if I have to be on the move |
| HADS-7 | I get sudden feelings of panic |
| HADS-8 | I still enjoy the things I used to enjoy |
| HADS-9 | I can laugh and see the funny side of things |
| HADS-10 | I feel cheerful |
| HADS-11 | I feel as if I am slowed down |
| HADS-12 | I have lost interest in my appearance |
| HADS-13 | I look forward with enjoyment to things |
| HADS-14 | I can enjoy a good book or radio/TV program |

1. **Multidimensional Scale of Perceived Social Support :**Please rate each statement from 1 (Very strongly disagree) to 7 (Very strongly agree).

| Item | Statement |
| --- | --- |
| MSPSS-1 | There is a special person who is around when I am in need. |
| MSPSS-2 | There is a special person with whom I can share joys and sorrows. |
| MSPSS-3 | I have a special person who is a real source of comfort to me. |
| MSPSS-4 | There is a special person in my life who cares about my feelings. |
| MSPSS-5 | My family really tries to help me. |
| MSPSS-6 | I get the emotional help and support I need from my family. |
| MSPSS-7 | I can talk about my problems with my family. |
| MSPSS-8 | My family is willing to help me make decisions. |
| MSPSS-9 | My friends really try to help me. |
| MSPSS-10 | I can count on my friends when things go wrong. |
| MSPSS-11 | I have friends with whom I can share my joys and sorrows. |
| MSPSS-12 | I can talk about my problems with my friends. |
